# Supplementary material for: Regulating Deceptive Advertising: False Claims and Skeptical Consumers
Source: Atypon-hosted journal article supplement (doi:10.1287/mksc.2020.1221), 2020-05-27
Supplement: mksc.2020.1221.sm1.pdf [file mksc.2020.1221.sm1.pdf]

# Regulating Deceptive Advertising: False Claims and Skeptical Consumers

## Online Appendix

Yue Wu      Tansev Geylani

### Proof of Lemma 5

The proof largely follows the proof of Lemma 2, and thus here we only highlight two key differences. First, in any separating equilibrium, by mimicking firm  $H$ , firm  $L$  faces a penalty  $b(1 - x)$  because all consumers purchase without verification. As a result, the equilibrium price is  $p_H^{\text{sep}} = \min \{V_H, V_L + \min_x [c(x) + b(1 - x)]\}$ .

Second, we will show that the stated pooling equilibrium is a PBE iff  $b$  is sufficiently small (i.e.,  $b \leq \hat{\kappa}$ , determined in the proof below). We have  $\pi_L = D_L \bar{V} - c(x) - b(1 - x)D_L = [1 - (1 - x)F(\tilde{s})][\bar{V} - b(1 - x)] - c(x)$ , where  $\tilde{s} = \phi(1 - \phi)(1 - x^e)(V_H - V_L)$ . Thus,

$$\frac{d\pi_L}{dx} = F(\tilde{s})[\bar{V} - 2b(1 - x)] - c'(x) + b, \quad (\text{W1})$$

which is decreasing in  $x$  for  $c'' > 2b$  (assumed in the extension). Given rational expectation of  $x$ , the equilibrium deceptiveness is  $x^* = x^{\text{pool}} \equiv \min \{\bar{x}, \hat{\chi}\}$ , where  $\hat{\chi} \in (0, +\infty)$  is determined by the first-order condition:

$$\hat{G}(\hat{\chi}) \equiv F(\phi(1 - \phi)(1 - \hat{\chi})(V_H - V_L))[\bar{V} - 2b(1 - \hat{\chi})] - c'(\hat{\chi}) + b = 0. \quad (\text{W2})$$

Note that if  $\bar{V} < b(1 - \hat{\chi})$  (which requires sufficiently large  $b$ ), then no pooling equilibrium can exist because of negative profit. Thus, in the rest of this proof regarding the pooling equilibrium, we can focus on  $\bar{V} \geq b(1 - \hat{\chi})$ . An interior solution  $\hat{\chi} \in (0, +\infty)$  exists because  $\hat{G}(0) > 0$  ( $\because \bar{V} \geq b(1 - \hat{\chi})$ ) and  $\hat{G}(+\infty) < 0$ . We have  $\hat{G}'(\hat{\chi}) = -\phi(1 - \phi)(V_H - V_L)f(\tilde{s})[\bar{V} -$

$2b(1 - \hat{\chi})] + 2bF(\tilde{s}) - c''(\hat{\chi}) = -\phi(1 - \phi)(V_H - V_L)f(\tilde{s})\bar{V} - (c''(\hat{\chi}) - 2b) - 2b[\bar{F}(\tilde{s}) - (1 - \hat{\chi})\phi(1 - \phi)(V_H - V_L)f(\tilde{s})] < 0$  because  $\bar{F}(\tilde{s})$  is sufficiently large compared to  $f(\cdot)$ . Thus,  $\hat{\chi}$  is unique.

Firm  $H$  has no incentive to deviate to any off-equilibrium strategy under  $\psi = 0$ . Firm  $L$  is not willing to deviate to any off-equilibrium strategy iff  $\pi_L \geq V_L$ , which is the highest profit it can earn under  $\psi = 0$ . To complete this proof, we just need to show that  $\pi_L$  is decreasing in  $b$  for any interior  $x^{\text{pool}} = \hat{\chi}$ . We have

$$\frac{d\pi_L}{db} = \frac{\partial\pi_L}{\partial b} + \frac{\partial\pi_L}{\partial x^e} \frac{d\hat{\chi}}{db}, \quad (\text{W3})$$

where

$$\frac{\partial\pi_L}{\partial b} = -(1 - \hat{\chi})[1 - (1 - \hat{\chi})F(\tilde{s})]; \quad (\text{W4})$$

$$\frac{\partial\pi_L}{\partial x^e} = (1 - \hat{\chi})\phi(1 - \phi)(V_H - V_L)f(\tilde{s})[\bar{V} - b(1 - \hat{\chi})]; \quad (\text{W5})$$

$$\frac{d\hat{\chi}}{db} = -\frac{\frac{\partial\hat{G}(\hat{\chi})}{\partial b}}{\hat{G}'(\hat{\chi})} = \frac{1 - 2(1 - \hat{\chi})F(\tilde{s})}{-\hat{G}'(\hat{\chi})}. \quad (\text{W6})$$

Therefore,

$$\begin{aligned} \frac{d\pi_L}{db} &= -(1 - \hat{\chi})[1 - (1 - \hat{\chi})F(\tilde{s})] + \frac{(1 - \hat{\chi})\phi(1 - \phi)(V_H - V_L)f(\tilde{s})[\bar{V} - b(1 - \hat{\chi})][1 - 2(1 - \hat{\chi})F(\tilde{s})]}{\phi(1 - \phi)(V_H - V_L)f(\tilde{s})[\bar{V} - 2b(1 - \hat{\chi})] - 2bF(\tilde{s}) + c''(\hat{\chi})} \\ &= -\frac{(1 - \hat{\chi})[c''(\hat{\chi}) - 2bF(\tilde{s}) - b(1 - \hat{\chi})\phi(1 - \phi)(V_H - V_L)f(\tilde{s})]}{\phi(1 - \phi)(V_H - V_L)f(\tilde{s})[\bar{V} - 2b(1 - \hat{\chi})] - 2bF(\tilde{s}) + c''(\hat{\chi})} \\ &\quad + \frac{(1 - \hat{\chi})^2 F(\tilde{s})[c''(\hat{\chi}) - 2bF(\tilde{s}) - \bar{V}\phi(1 - \phi)(V_H - V_L)f(\tilde{s})]}{\phi(1 - \phi)(V_H - V_L)f(\tilde{s})[\bar{V} - 2b(1 - \hat{\chi})] - 2bF(\tilde{s}) + c''(\hat{\chi})} \\ &\leq -\frac{(1 - \hat{\chi})[1 - (1 - \hat{\chi})F(\tilde{s})][c''(\hat{\chi}) - 2bF(\tilde{s}) - b(1 - \hat{\chi})\phi(1 - \phi)(V_H - V_L)f(\tilde{s})]}{\phi(1 - \phi)(V_H - V_L)f(\tilde{s})[\bar{V} - 2b(1 - \hat{\chi})] - 2bF(\tilde{s}) + c''(\hat{\chi})} \\ &= -\frac{(1 - \hat{\chi})[1 - (1 - \hat{\chi})F(\tilde{s})]\{c''(\hat{\chi}) - 2b + b[2\bar{F}(\tilde{s}) - (1 - \hat{\chi})\phi(1 - \phi)(V_H - V_L)f(\tilde{s})]\}}{-\hat{G}'(\hat{\chi})} < 0. \quad (\text{W7}) \end{aligned}$$

Therefore, the stated pooling equilibrium exists iff  $b \leq \hat{\kappa}$ , where the threshold  $\hat{\kappa}$  is the value of  $b$  such that  $\pi_L = [1 - (1 - x^{\text{pool}})F(\tilde{s})][\bar{V} - b(1 - x^{\text{pool}})] - c(x^{\text{pool}}) = V_L$ .

## Proof of Lemma 6

This lemma is implied by the proof of Lemma 5. The boundary solution  $x^{\text{pool}} = \bar{x}$  is invariant in  $b$ . The interior solution  $x^{\text{pool}} = \hat{\chi}$  is increasing in  $b$  iff  $M(b) \equiv 1 - 2(1 - \hat{\chi})F(\tilde{s}) > 0$  (see Equation (W6)). Note that  $M$  is affected by  $b$  only through  $\hat{\chi}$  and it is strictly increasing in  $\hat{\chi}$ . As a result, for any  $b$ , if  $M(b) > 0$ , then for any  $b' > b$  we have  $M(b') > M(b) > 0$ . Similarly, for any  $b$ , if  $M(b) \leq 0$ , then for any  $b' > b$  we have  $M(b') \leq M(b) \leq 0$ . Therefore, the sign of  $M$  is the same as the sign of  $M(0)$ .

Next, we prove that  $M(0) > 0$  iff  $\bar{V} > \tilde{V}$ , where  $\tilde{V}$  is determined below. If  $F(\phi(1 - \phi)(V_H - V_L)) < 1/2$ , then  $M = 1 - 2(1 - \hat{\chi})F(\phi(1 - \phi)(1 - \hat{\chi})(V_H - V_L)) > 0$  for any  $\bar{V}$ , and thus we can set the threshold  $\tilde{V} = 0$ . Otherwise,  $M$  can be negative. Because  $\partial \hat{G}(\hat{\chi}) / \partial \bar{V} = F(\tilde{s}) > 0$ , we have  $d\hat{\chi}/d\bar{V} = -\frac{\partial \hat{G}(\hat{\chi})}{\partial \bar{V}} / \hat{G}'(\hat{\chi}) > 0$ . Because  $F(\phi(1 - \phi)(V_H - V_L)) \geq 1/2$ , there exists  $\hat{\chi} = \hat{\chi}'$  such that  $M(0) = 0$ . Because  $\hat{\chi}$  is increasing in  $\bar{V}$  and is not converging, there exists  $\bar{V} = \tilde{V}$  such that  $\hat{\chi} = \hat{\chi}'$  (which makes  $M(0) = 0$ ). Therefore,  $M(0) > 0$  iff  $\bar{V} > \tilde{V}$ , where  $\tilde{V}$  is determined by  $M(0) = 0$ . Similarly, it can be shown that  $M(0) \leq 0$  iff  $\bar{V} \leq \tilde{V}$ . Thus,  $x^{\text{pool}}$  is increasing in  $b$  iff  $\bar{V} > \tilde{V}$ .

## Proof of Proposition 6

Following the proof of Proposition 2 (see part (i)), in any pooling equilibrium, for  $x^{\text{pool}} = \bar{x}$ ,  $dCS/db = 0$ ; for  $x^{\text{pool}} = \hat{\chi}$ ,  $dCS/db$  has the opposite sign to  $d\hat{\chi}/db$ . Therefore, from Equation (W6), the consumer surplus  $CS$  is decreasing in  $b$  iff  $\bar{V} > \tilde{V}$ .

Now we investigate the equilibrium shift from the pooling equilibrium to the separating equilibrium at  $b = \hat{\kappa}$ . For any  $b \leq \hat{\kappa}$ , we have  $\pi_L \geq V_L \iff [1 - (1 - x^{\text{pool}})F(\tilde{s})]\bar{V} \geq V_L + c(x^{\text{pool}}) + b(1 - x^{\text{pool}})[1 - (1 - x^{\text{pool}})F(\tilde{s})]$ , which implies  $\bar{V} > V_L + c(x^{\text{pool}}) + b(1 - x^{\text{pool}}) \geq$

$V_L + \min_x [c(x) + b(1 - x)] \geq p_H^{\text{sep}}$ , and so  $p_H^{\text{sep}} < \bar{V}$ . Part (ii) of the proof of Proposition 2 can be used to show that at  $b = \hat{\kappa}$ ,  $CS^{\text{pool}} < CS^{\text{sep}}$ .

In the separating equilibrium, because  $p_H^{\text{sep}} = \min \{V_H, V_L + \min_x [c(x) + b(1 - x)]\}$  is (weakly) increasing in  $b$ , consumer surplus is (weakly) decreasing in  $b$ .
